# Supplementary material for: Specialized Yeast Ribosomes: A Customized Tool for Selective mRNA Translation
Source: PLoS One. 2013 Jul 8;8(7):e67609. doi: 10.1371/journal.pone.0067609 (PMC3704640; doi:10.1371/journal.pone.0067609)
Supplement: Table S3 — Grand mean of reporter expression profiling. (XLSX) [file pone.0067609.s004.xlsx]

## Sheet: Tabelle1
	Supplementary Table S3. Grand mean of reporter expression profiling.
		FF	REN[FF]	FFPTC	REN[FFPTC]	LA3FF	REN[LA3FF]	LA3PTCFF	REN[LA3PTCFF]
	Grandmean	1.84563e+07	1.86796e+08	5330.56	1.79632e+08	15730.8	2.26865e+08	4337.13	2.04832e+08
	Maximum	79318200	4.04594e+08	14788.3	4.13247e+08	43019.9	575217500	16810.4	339592000
	Minimum	4.40157e+06	57341600	1597.27	8.08765e+07	2719.53	7.50738e+07	1244.81	8.94168e+07
	StandDev.	1.09593e+07	5.9525e+07	2369.1	6.34921e+07	8085.22	7.80167e+07	2194.67	5.4572e+07
