# Supplementary material for: Specialized Yeast Ribosomes: A Customized Tool for Selective mRNA Translation
Source: PLoS One. 2013 Jul 8;8(7):e67609. doi: 10.1371/journal.pone.0067609 (PMC3704640; doi:10.1371/journal.pone.0067609)
Supplement: Table S12 — Heat map of specialized ribosome strains with increasing specificity to increase LAMB3-PTC expression, while leaving expression of the other reporters largely unaltered. (XLSX) [file pone.0067609.s013.xlsx]

## Sheet: Tabelle1
	Supplementary Table S12. Heat map of personalized ribosome strains with increasing specificity to increase LAMB3-PTC expression, while leaving expression of the other reporters largely unaltered.
				FF	FFPTC	LA3FF	LA3PTCFF	REN[FF]	REN[FFPTC]	REN[LA3FF]	REN[LA3PTCFF]
	No significant change		dRPL1B	0.977901	1.3485	1.09445	1.00738	1.10713	0.844467	0.895716	0.97928
			dRPL8A	0.867317	1.06246	0.908434	0.684376	1.08062	1.12581	0.818166	1.01361
			dRPL16A	0.857773	0.943763	0.688802	0.914799	0.951514	0.938132	0.847897	0.865154
			dRPL18A	0.959784	0.724008	1.23381	0.806583	0.885652	1.0688	0.908369	0.955523
			dRPL22B	0.991589	0.865575	0.945914	0.707145	0.859414	0.96838	0.988696	1.02521
			dRPL35A	1.34224	1.04728	1.14092	0.630369	0.974682	1.03677	1.04283	0.787344
			dRPL42A	1.21838	0.79576	1.30814	0.952923	0.960905	1.11833	0.876538	0.883179
	General excluding PTC	↑	dRPS27B	2.00359	1.57948	2.08422	1.11044	1.3588	2.4219	2.80804	1.38363
			dRPS30B	1.81535	1.10132	1.39337	1.40756	1.50073	1.60246	1.59758	1.58566
		↓	dRPS2	0.549989	1.24347	0.458793	0.880559	0.804231	0.879116	0.686955	0.722671
			dRPS29B	0.637739	1.24344	0.533945	0.94561	0.570613	0.563726	0.506316	0.563999
			dRPL34A	0.696632	0.557765	0.506623	0.7241	0.6236	0.557066	0.580516	0.581452
	General including PTC	↓	dRPS9B	0.837572	0.840796	0.474996	0.68933	0.688981	0.488129	0.607921	0.516559
			dRPL19B	0.633464	0.684464	0.417296	0.50921	0.45384	0.653918	0.448931	0.460143
			dRPL18B	0.525298	1.05765	0.575006	1.1202	0.857521	0.834046	0.756194	0.8775
			dRPL28	0.63184	0.858494	0.593161	1.17931	0.807034	0.920272	0.998362	0.905368
	Customized PTC	↑	dRPL36A	0.765667	1.60432	1.07796	0.971272	1.03563	0.929542	0.86693	0.944474
			dRPS3	0.908188	2.17521	1.04558	1.77161	0.939094	0.861913	0.825163	0.803989
			dRPL2A	0.909024	2.59781	1.97986	3.66769	0.626919	0.793169	0.989434	1.02611
			dRPL40B	0.587167	0.967206	0.729686	1.6445	0.772485	0.883227	0.938227	1.09608
			dRPL35B	0.663903	1.06949	0.864636	1.84238	1.16798	0.806395	0.806542	0.836599
			Significantly up (p≥0.95)
			Significantly down (p≥0.95)
